# Supplementary material for: Boosting CO2 electroreduction on a Zn electrode via concurrent surface reconstruction and interfacial surfactant modification
Source: Royal Society of Chemistry journal article supplement (doi:10.1039/d2dt03685a), 2022-12-20
Supplement: d2dt03685a1.pdf [file d2dt03685a1.pdf]

**Electronic Supplementary Information for**

**Boosting CO<sub>2</sub> electroreduction on a Zn electrode via**

**concurrent surface reconstruction and interfacial surfactant**

**modification**

Hui Pan,<sup>a</sup> Fang Wang,<sup>a</sup> Shixiong She,<sup>b</sup> Zhengguo Zhang<sup>a</sup> and Shixiong Min<sup>\*a</sup>

<sup>a</sup> *School of Chemistry and Chemical Engineering, North Minzu University, Yinchuan, 750021, P. R. China.*

<sup>b</sup> *College of Chemical Engineering, Qinghai University, Xining 810016, P. R. China.*

\*Corresponding authors: [sxmin@nun.edu.cn](mailto:sxmin@nun.edu.cn)

## **1. Experimental**

### **1.1 Chemicals and reagents**

All chemicals used in this work were of analytical grade and used without further purification. Zinc foil (99.99%, thickness: 0.3 mm) was purchased from Tengfeng Metal Materials Co., Ltd. Cetyltrimethylammonium bromide (CTAB, 99%) and Potassium bicarbonate (KHCO<sub>3</sub>, 99.5%) were obtained from Aladdin Industrial Co., Ltd. The CO<sub>2</sub> (99.999%) and N<sub>2</sub> was purchased from Jinghua Industrial Gas Co., Ltd. Nafion 117 membrane was provided by Alfa Aesar Chemical Co., Ltd. Ultrapure water (18.2 MΩ cm) obtained from a water purification system (Hitech ECO-S15) was used in all experiments. The pH value of the electrolyte saturated with CO<sub>2</sub> was determined to be 6.8.

### **1.2 Synthesis of annealed Zn electrodes**

A piece of zinc foil (1.0 cm×1.5 cm) was mechanically polished with sandpaper (2000 mesh) to remove the natural oxide layer, and then successively washed with acetone, water, and ethanol, and finally dried under a flow of N<sub>2</sub> at room temperature. Zn foil was annealed in a tubular CVD furnace under static air atmosphere at different temperatures ranging from 400 to 700 °C for 6 h.

### **1.3 Synthesis of OD-Zn and OD-Zn-CTAB electrodes**

OD-Zn and OD-Zn-CTAB electrodes were obtained by in situ electrochemical reduction of annealed Zn electrodes in CO<sub>2</sub>-saturated 0.1 M KHCO<sub>3</sub> electrolyte without and with addition of CTAB (50 μM) at -0.8 V *vs.* RHE for 1 h, respectively.

### **1.4 Electrochemical measurements**

The electrochemical CO<sub>2</sub> reduction experiments were performed in a H-type cell separated by a Nafion 117 membrane with a CHI660E electrochemical workstation (CH Instruments, Inc., Shanghai). An Ag/AgCl (in a saturated KCl solution) and a Pt coil

were used as the reference electrode and the counter electrode, respectively, and CO<sub>2</sub>-saturated 0.1 M KHCO<sub>3</sub> (pH 6.8) was used as electrolyte. All the applied potentials were reported as reversible hydrogen electrode (RHE) potentials scale using  $E$  (vs. RHE) =  $E$  (vs. Ag/AgCl) + 0.656 V -  $iR_s$ . The reference electrode was calibrated with a Pt coil as the working electrode for the reversible hydrogen potential in the electrolyte solution purged with N<sub>2</sub> for 30 min and saturated high purity H<sub>2</sub> prior to the measurements. The cyclic voltammetry (CV) was run at a scan rate of 1 mV s<sup>-1</sup>, and the average of the two potentials at which the current crossed zero was taken to be the thermodynamic potential for the hydrogen electrode reactions.<sup>1</sup> Linear sweep voltammetry (LSV) measurements for the electrodes was carried out in were performed N<sub>2</sub>- or CO<sub>2</sub>-bubbled 0.1 M KHCO<sub>3</sub> solution with a scan rate of 1 mV s<sup>-1</sup>. For the bulk CO<sub>2</sub> electrolysis, the cathodic compartment was purged with CO<sub>2</sub> (99.999%) at a constant rate of 10 mL min<sup>-1</sup>. The eluent was delivered directly to the sampling loop of an on-line pre-calibrated gas chromatograph (PANNA GC-A91 plus) equipped with a thermal conductivity detector (TCD) and a flame ionization detector (FID). Faradaic efficiency (FE) of gaseous products at each applied potential was calculated based on following equation:

$$FE_i(\%) = \frac{Z_i \times G \times V_i \times t \times p_0 \times F \times 10^{-3}}{Q_{total} \times R \times T_0} \times 100\%$$

where  $Z_i$  is the number of electrons transferred (for CO and H<sub>2</sub> production;  $Z=2$ );  $G$  is volumetric flow rate (10 mL min<sup>-1</sup>);  $V_i$  is the volume ratio of gas product  $i$ ;  $t$  is reaction time (min);  $P_0$  and  $T_0$  are atmospheric pressure (101.3 KPa) and reaction temperature (298.15 K); respectively.  $F$  is faradaic constant (96485 C mol<sup>-1</sup>);  $Q_{total}$  is integrated charge at each applied potential and  $R$  is ideal gas constant (8.314 J·mol<sup>-1</sup> K<sup>-1</sup>).

At the end of the electrolysis, the produced liquid phase products were detected by

using a high-performance liquid chromatography (HPLC, Hitachi) system equipped with C18 column and UV detector. A mixture of methanol (10 %) and phosphoric acid (pH 2) was used as the mobile phase at 25 °C with a continuous flow rate of 0.6 mL min<sup>-1</sup>.

### 1.5 Electrochemical impedance spectroscopy measurements

Electrochemical impedance measurements were performed in CO<sub>2</sub>-saturated 0.1 M KHCO<sub>3</sub> electrolytes in the absence or presence of CTAB at different polarization potentials. Within the frequency range between 10<sup>5</sup> Hz and 0.01 Hz and 5 mV amplitude. We used the equivalent circuit of Fig. 4b to simulate the experimental data points. Double layer capacitances were calculated using the equation, where  $R_s$  is the solution resistance,  $R_{ct}$  is the charge transfer resistance, CPE is the constant phase element,  $n$  is the fitting parameter which was also found after the fitting of the Nyquist plots. Double layer capacitance ( $C_{dl}$ ) value has been calculated using the equation as follows:

$$C_{dl} = \{R_{CT}^{(1-N)} CPE\}^{(1/N)}$$

### 1.6 Determination of the electrochemically active surface areas (ECSAs)

Cyclic voltammetry (CV) tests were performed in CO<sub>2</sub>-purged 0.05 M K<sub>3</sub>[Fe[(CN)<sub>6</sub>]] solution (0.1 M KHCO<sub>3</sub> as supporting electrolyte) to determine the electrochemically active surface areas (ECSAs) of the all samples.<sup>2-3</sup> In this system, the relationship between the peak current value  $[(i_{pc} + i_{pa})/2]$  and the square root of the potential scanning velocity ( $v^{1/2}$ ) can be described by the Randles-Sevcik equation:

$$i_p = 2.69 \times 10^5 n^{3/2} A D^{1/2} v^{1/2} C$$

where  $i_p$  is the peak current value (A);  $n$  is the number of electron transfer;  $A$  is the ESCA of the electrode (cm<sup>2</sup>);  $D$  is the diffusion coefficient (cm<sup>2</sup> s<sup>-1</sup>);  $C$  is the concentration of K<sub>3</sub>[Fe[(CN)<sub>6</sub>]] (mol cm<sup>-3</sup>);  $v$  is the scanning speed (V s<sup>-1</sup>).

## 1.7 Characterizations

X-ray powder diffraction (XRD) was performed with a Rigaku smart lab diffractometer operated at 40 kV and 40 mA with nickel filtrated Cu  $K\alpha$  radiation. X-ray photoelectron spectroscopy (XPS) analysis were performed using Thermo Scientific ESCALAB 250Xi instrument. The instrument was equipped with an electron flood and a scanning ion gun. All spectra were calibrated according to the C 1s binding energy at 284.8 eV. Scanning electron microscopy (SEM) and energy X-ray spectrometer (EDS) were performed using a field emission microscope (SIGMA 500) for analyze the morphology and composition of the catalyst.

## 2. Additional data

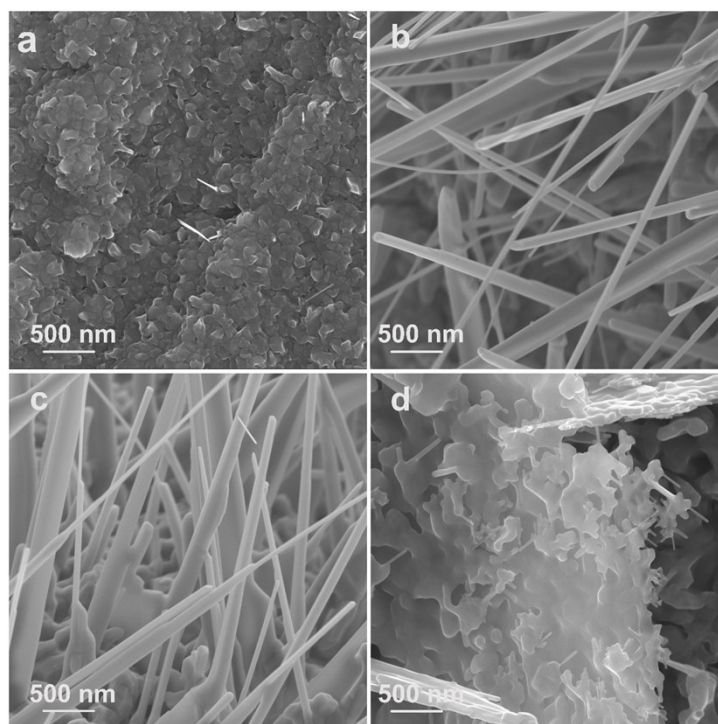

**Fig. S1** SEM images of annealed Zn electrodes prepared by annealing Zn foil at (a) 400 °C, (b) 500 °C, (c) 600 °C and (d) 700 °C.

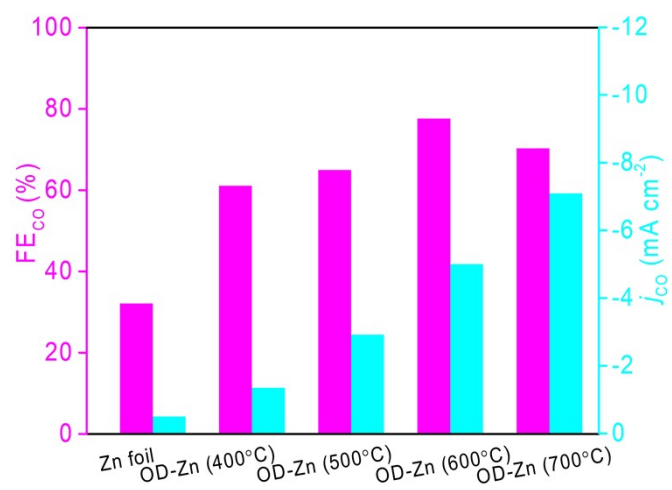

**Fig. S2**  $FE_{CO}$  and  $j_{CO}$  for Zn foil and OD-Zn electrodes in CO<sub>2</sub>-saturated 0.1 M KHCO<sub>3</sub> electrolyte.

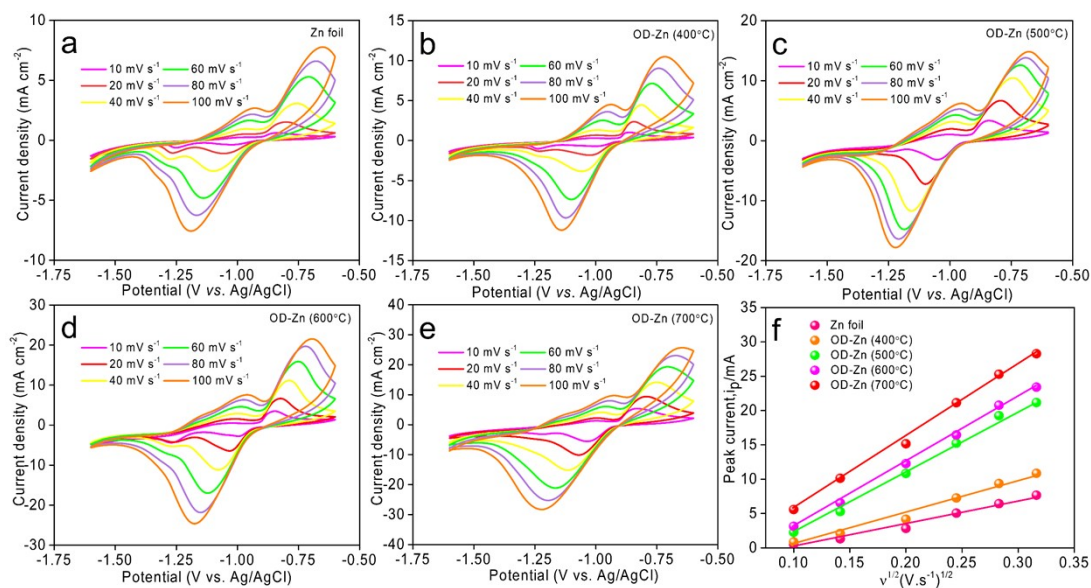

**Fig. S3** Cyclic voltammograms (CV) of (a) pristine Zn foil and (b-e) OD-Zn electrodes at different scan rates. (f) The curves of the peak current ( $(i_{pc}+i_{pa})/2$ ) as a function of square root of the scan rate ( $v^{1/2}$ ) of all samples.

**Table S1** Electrochemical active surface areas (ECSAs) of pristine Zn foil and OD-Zn electrodes.

| Electrode      | ECSA (cm <sup>2</sup> ) |
|----------------|-------------------------|
| Zn foil        | 1.02                    |
| OD-Zn (400 °C) | 1.43                    |
| OD-Zn (500 °C) | 2.72                    |
| OD-Zn (600 °C) | 2.85                    |
| OD-Zn (700 °C) | 3.17                    |

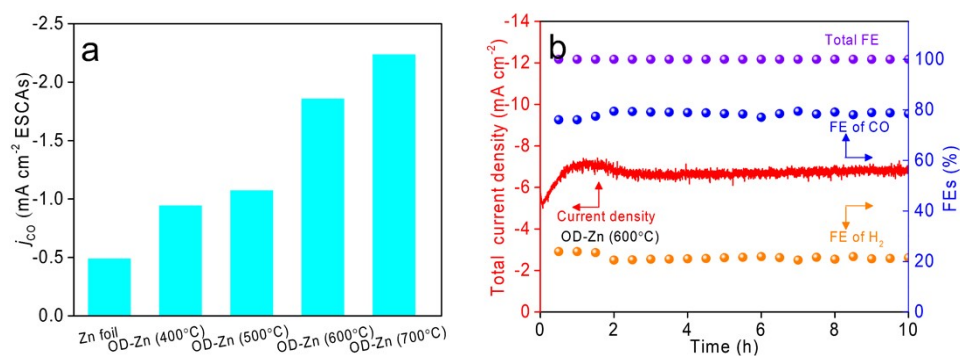

**Fig.S4** (a) ECSA-normalized  $j_{CO}$  of pristine Zn foil and OD-Zn electrodes. (b) Electrochemical stability of OD-Zn (600 °C) electrode for CO<sub>2</sub> reduction in CO<sub>2</sub>-saturated 0.1 M KHCO<sub>3</sub> at -1.0 V vs. RHE over a period of 10 h.

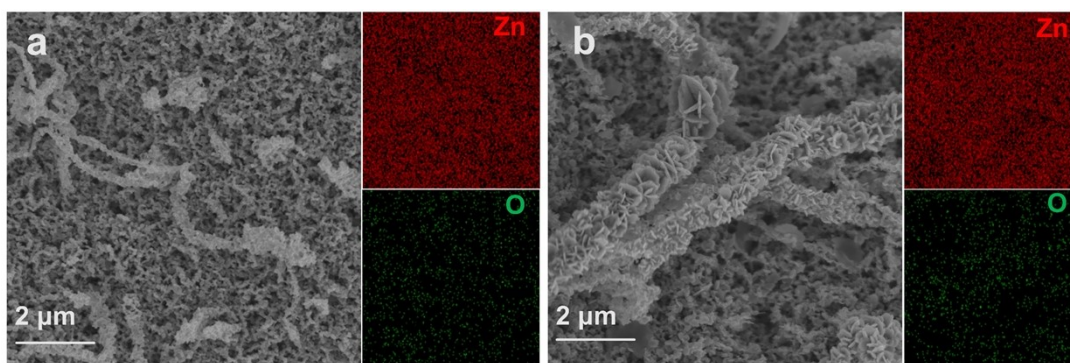

**Fig. S5** SEM images of OD-Zn and OD-Zn-CTAB electrodes and the corresponding elemental maps (Zn and O).

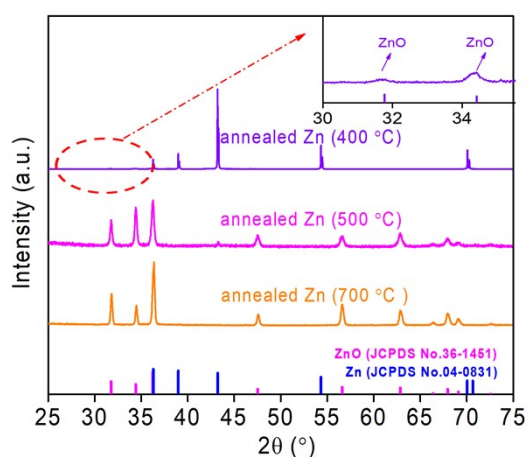

**Fig. S6** XRD patterns of annealed Zn electrodes.

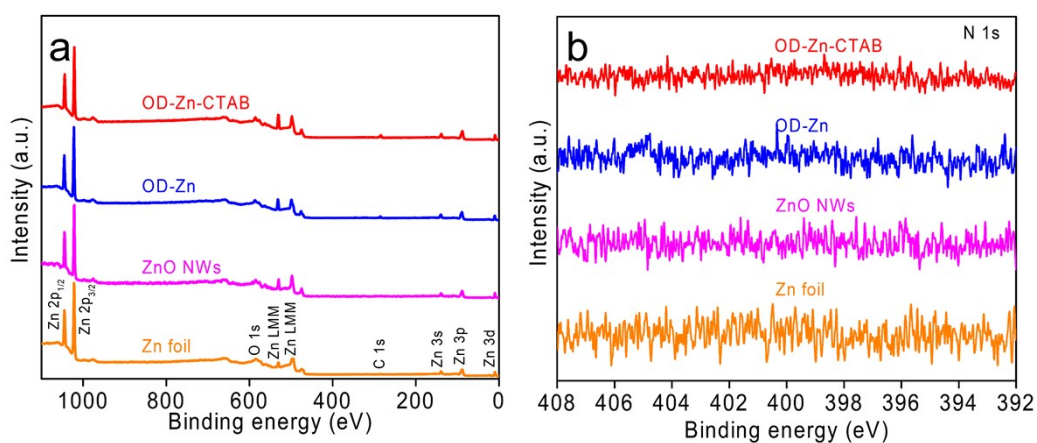

**Fig. S7** Survey and N 1s XPS spectrum and of Zn foil, ZnO NWs, OD-Zn and OD-Zn-CTAB



**Table S2** Comparison of electrocatalytic performances of Zn-based catalysts for CO<sub>2</sub> reduction.

| Catalysts                                | Electrolyte                             | Potential (V vs. RHE) | $j_{\text{CO}}$ (mA cm <sup>-2</sup> ) | FE <sub>CO</sub> | Overpotential for CO <sub>2</sub> reduction | Ref.             |
|------------------------------------------|-----------------------------------------|-----------------------|----------------------------------------|------------------|---------------------------------------------|------------------|
| Porous nanostructured Zn                 | 0.5 M KHCO <sub>3</sub>                 | -0.9                  | ~6.6                                   | 77.8%            | 0.79                                        | 4                |
| Zn/carbon/Ag                             | 0.5 M KHCO <sub>3</sub>                 | -1.0                  | ~7.3                                   | 86%              | 0.89                                        | 5                |
| Multilayered Zn nanosheets               | 0.5 M NaHCO <sub>3</sub>                | -1.13                 | ~7.8                                   | 86%              | 1.02                                        | 6                |
| Commercial Zn foil                       | 0.1 M KHCO <sub>3</sub>                 | -1.3                  | ~4.1                                   | 78.9             | 1.19                                        | 7                |
| Porous Zn                                | 0.1M KHCO <sub>3</sub>                  | -0.8                  | ~1.2                                   | 81%              | 0.69                                        | 8                |
| Ag nanoparticles decorated Zn nanoplates | 0.1 M KHCO <sub>3</sub>                 | -0.8                  | ~4.9                                   | 84%              | 0.69                                        | 9                |
| Hexagonal Zn nanoplates                  | 0.1 M KHCO <sub>3</sub>                 | -0.96                 | ~6                                     | 94.2%            | 0.85                                        | 10               |
| ZnS/Zn/ZnS                               | 0.1 M KHCO <sub>3</sub>                 | -0.8                  | ~9                                     | 94.2%            | 0.69                                        | 11               |
| Nanoscale Zn                             | 0.5 M NaCl                              | -1.6                  | ~2.2                                   | 93%              | 1.49                                        | 12               |
| <b>OD-Zn-CTAB</b>                        | <b>0.1M KHCO<sub>3</sub> (50M CTAB)</b> | <b>-1.0</b>           | <b>~8.2</b>                            | <b>90%</b>       | <b>0.89</b>                                 | <b>This word</b> |

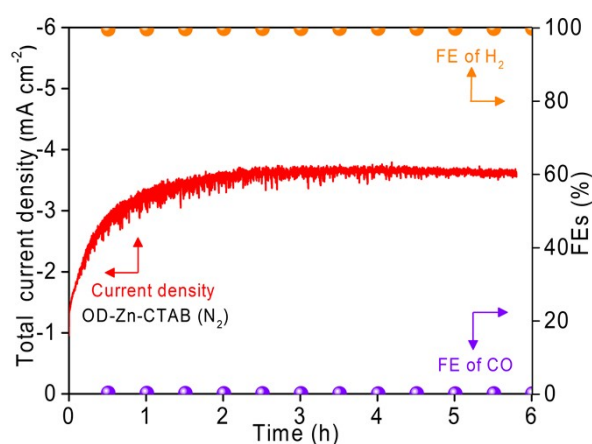

**Fig. S8** The total current density and FEs of CO and H<sub>2</sub> over OD-Zn-CTAB electrode in N<sub>2</sub>-saturated 0.1 M KHCO<sub>3</sub> solution with 50 μM CTAB at -1.0 V vs. RHE.

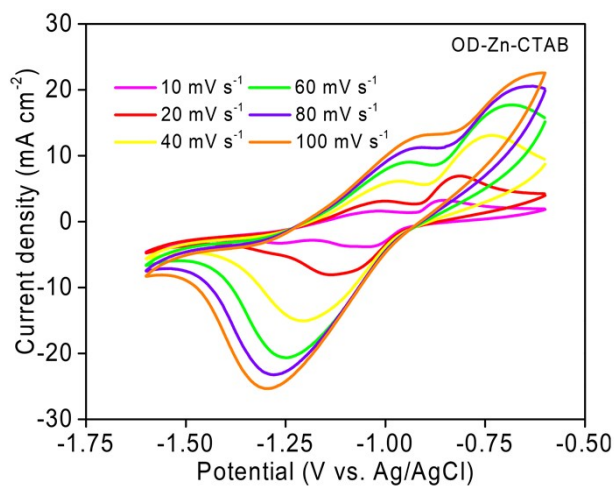

**Fig. S9** Cyclic voltammograms (CV) of OD-Zn-CTAB.

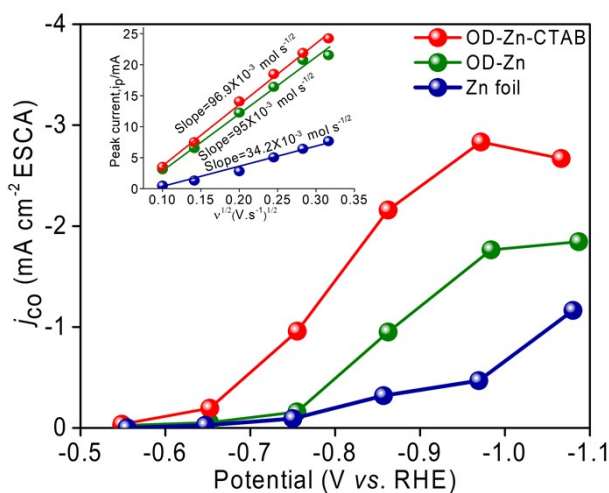

**Fig. S10** ECSA-normalized CO current densities of Zn foil, OD-Zn and OD-Zn-CTAB. The insets in panel are the curves of the peak current ( $(i_{pc} + i_{pa})/2$ ) as a function of square root of the scan rate ( $v^{1/2}$ ).

**Table S3** Electrochemical active surface areas (ECSAs) of Zn foil, OD-Zn and OD-Zn-CTAB.

| Electrode  | ECSA (cm <sup>2</sup> ) |
|------------|-------------------------|
| Zn foil    | 1.02                    |
| OD-Zn      | 2.85                    |
| OD-Zn-CTAB | 2.89                    |

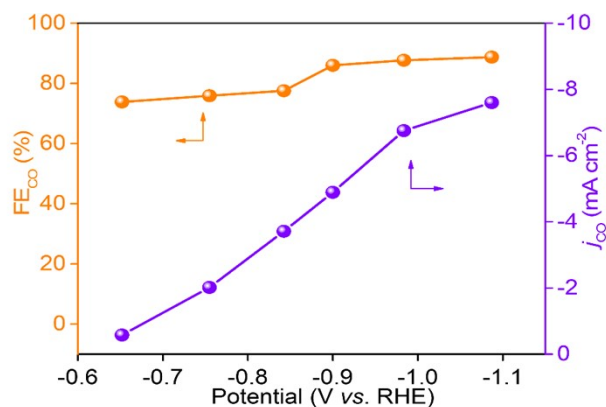

**Fig. S11**  $FE_{CO}$  and  $j_{CO}$  for Zn foil electrode in  $CO_2$ -saturated 0.1 M  $KHCO_3$  in presence of 50  $\mu M$  CTAB.

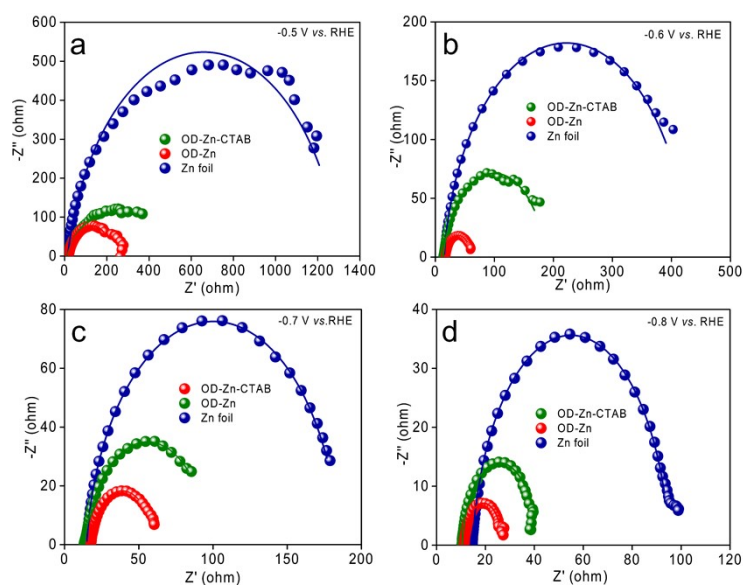

**Fig. S12** Nyquist plots of Zn foil, OD-Zn, and OD-Zn-CTAB at different potentials.

**Table S4.** Simulated impedance parameters of Nyquist plots in variously potentials with and without CTAB.

| Catalyst   | E (V vs. RHE) | $R_s$ ( $\Omega$ ) | $R_{CT}$ ( $\Omega$ ) | $C_{dl}$ ( $\mu F\ cm^{-2}$ ) |
|------------|---------------|--------------------|-----------------------|-------------------------------|
| OD-Zn-CTAB | -0.5          | 12.7               | 343.6                 | 344.5                         |
|            | -0.6          | 12.8               | 173.9                 | 293.4                         |
|            | -0.7          | 13.0               | 85.2                  | 293.4                         |
|            | -0.8          | 13.2               | 30.7                  | 223.0                         |
| OD-Zn      | -0.5          | 17.3               | 222.0                 | 2498.0                        |
|            | -0.6          | 17.7               | 43.2                  | 594.5                         |
|            | -0.7          | 17.7               | 43.1                  | 475.5                         |
|            | -0.8          | 19.3               | 15.2                  | 238.3                         |

## References

1. S. Banerjee, X. Han and V. S. Thoi, *ACS Catal.*, 2019, **9**, 5631-5637.
2. X. L. Cui, Q. Zhao, Z. Z. Li, Z. Y. Sun and Z. Y. Jiang, *Nanotechnology*, 2007, **18**, 215701.
3. H. Pan, F. Wang, Z. G. Zhang and S. X. Min, *Sustainable Energy Fuels*, 2022, **6**, 2149-2154.
4. D. L. Nguyen, M. S. Jee, D. H. Won, H. Jung, H. S. Oh, B. K. Min and Y. J. Hwang, *ACS Sustainable Chem. Eng.*, 2017, **5**, 11377-11386.
5. F. Yang, P. Song, X. Liu, B. Mei, W. Xing, Z. Jiang, L. Gu and W. Xu, *Angew. Chem. Int. Ed.*, 2018, **57**, 12303-12307.
6. T. Zhang, X. Li, Y. Qiu, P. Su, W. Xu, H. Zhong and H. Zhang, *J. Catal.*, 2018, **357**, 154-162.
7. Z. Chen, K. Mou, S. Yao and L. Liu, *ChemSusChem*, 2018, **11**, 2944-2952.
8. M. Morimoto, Y. Takatsuji, K. Hirata, T. Fukuma, T. Ohno, T. Sakakura and T. Haruyama, *Electrochim. Acta*, 2018, **290**, 255-261.
9. F. Quan, D. Zhong, H. Song, F. Jia and L. Zhang, *J. Mater. Chem. A*, 2015, **3**, 16409-16413.
10. J. Xiao, M. R. Gao, S. B. Liu, J. L. Luo, *ACS Appl. Mater. Interfaces*, 2020, **12**, 31431-31438.
11. C. Li, G. Shen, R. Zhang, D. Wu, C. Zou, T. Ling, H. Liu, C. Dong and X. W. Du, *J. Mater. Chem. A*, 2019, **7**, 1418-1423.
12. Q. Yu, X. Meng, L. Shi, H. Liu and J. Ye, *Chem. Commun.*, 2016, **52**, 14105-14108.
